# Supplementary material for: Baseline factors predicting the need for corneal crosslinking in patients with keratoconus
Source: PubMed Central journal article supplement (PMC7162475; doi:10.1371/journal.pone.0231439), 2020-04-16
Supplement: pone.0231439.s001.pdf [file pone.0231439.s001.pdf]

|     |   |   |               |   |      |       |      |       |      |      |      |       |       |      |        |     |     |
|-----|---|---|---------------|---|------|-------|------|-------|------|------|------|-------|-------|------|--------|-----|-----|
| 102 | M | 1 | 15-19         | 1 | 61.4 | -10.0 | 57.5 | 112   | 0.67 | 1.33 | 1.10 | 16.7  | 0.008 | 5.17 | 3      | 485 | 420 |
| 103 | F | 0 | 50 or older   | 0 | 52.0 | -7.7  | 50.4 | 65    | 0.61 | 1.18 | 1.05 | 15.3  | 0.081 | 6.27 | 2      | 440 | 416 |
| 104 | M | 0 | 35-39         | 0 | 67.8 | -11.2 | 63.9 | 118   | 0.29 | 1.25 | 1.15 | 5.6   | 0.091 | 4.82 | 3      | 396 | 374 |
| 105 | M | 0 | 15-19         | 0 | 47.7 | -7.5  | 46.2 | 75    | 0.84 | 1.20 | 1.08 | 10.7  | 0.106 | 6.22 | 2      | 490 | 478 |
| 106 | M | 0 | 30-34         | 0 | 55.2 | -8.8  | 53.1 | 75    | 0.59 | 1.22 | 1.03 | 17.3  | 0.039 | 5.29 | 2      | 420 | 309 |
| 107 | M | 0 | 40-44         | 0 | 72.3 | -11.4 | 71.2 | 193   | 1.24 | 1.62 | 1.29 | 7.6   | 0.307 | 3.73 | 3-4    | 491 | 352 |
| 108 | F | 0 | 50 or older   | 0 | 47.5 | -6.7  | 46.6 | 98    | 1.23 | 1.21 | 0.99 | 45.0  | 0.175 | 5.90 | 2-3    | 518 | 480 |
| 109 | M | 1 | 15-19         | 0 | 59.9 | -9.7  | 59.1 | 183   | 1.92 | 1.65 | 1.18 | 68.0  | 0.355 | 4.54 | 3-4    | 501 | 411 |
| 110 | M | 1 | 25-29         | 0 | 59.9 | -9.3  | 57.8 | 92    | 0.63 | 1.27 | 1.03 | 11.8  | 0.026 | 5.03 | 2-3    | 368 | 313 |
| 111 | M | 1 | 40-44         | 0 | 57.5 | -9.3  | 55.5 | 115   | 0.78 | 1.28 | 1.09 | 70.9  | 0.136 | 5.04 | 3      | 529 | 469 |
| 112 | M | 0 | 25-29         | 0 | 62.1 | -10.6 | 57.3 | 94    | 0.82 | 1.34 | 0.99 | 38.3  | 0.186 | 4.75 | 2-3    | 393 | 249 |
| 113 | M | 0 | 25-29         | 0 | 65.6 | -10.1 | 65.9 | 196   | 1.65 | 1.55 | 1.34 | 180.3 | 0.363 | 3.81 | 3-4    | 516 | 451 |
| 114 | M | 0 | 15-19         | 1 | 47.6 | -7.2  | 46.1 | 30    | 0.19 | 1.05 | 1.03 | 8.7   | 0.033 | 6.87 | Poss   | 501 | 495 |
| 115 | F | 0 | 35-39         | 0 | 54.0 | -8.3  | 52.3 | 82    | 0.78 | 1.24 | 1.08 | 13.3  | 0.134 | 5.58 | 2      | 467 | 437 |
| 116 | M | 0 | 20-24         | 0 | 46.5 | -7.3  | 44.6 | 37    | 0.42 | 1.10 | 1.02 | 26.8  | 0.051 | 6.79 | 1      | 535 | 522 |
| 117 | F | 0 | 50 or older   | 0 | 49.2 | -7.4  | 47.4 | 26    | 0.19 | 1.04 | 1.02 | 12.6  | 0.023 | 6.64 | Abnorm | 575 | 565 |
| 118 | F | 0 | 50 or older   | 0 | 98.6 | -16.8 | 98.6 | 299   | 1.26 | 1.77 | 1.56 | 189.6 | 0.495 | 2.61 | 4      | 390 | 354 |
| 119 | M | 0 | 20-24         | 0 | 47.6 | -7.2  | 46.6 | 92    | 1.13 | 1.25 | 1.04 | 80.1  | 0.145 | 6.16 | 2-3    | 479 | 460 |
| 120 | M | 0 | 20-24         | 0 | 60.2 | -9.7  | 59.0 | 120   | 0.64 | 1.25 | 1.21 | 87.5  | 0.105 | 4.76 | 3      | 459 | 425 |
| 121 | F | 0 | 40-44         | 0 | 49.7 | -7.6  | 48.0 | 69    | 0.77 | 1.11 | 1.03 | 19.2  | 0.093 | 6.37 | 2      | 509 | 477 |
| 122 | M | 1 | 14 or younger | 0 | 49.2 | -7.0  | 48.3 | 160   | 2.10 | 1.46 | 1.04 | 46.1  | 0.262 | 5.64 | 3-4    | 473 | 435 |
| 123 | M | 1 | 15-19         | 0 | 55.1 | -8.2  | 53.5 | 94    | 0.76 | 1.25 | 1.10 | 37.4  | 0.115 | 5.49 | 2-3    | 482 | 467 |
| 124 | M | 0 | 35-39         | 0 | 44.6 | -6.8  | 43.4 | 82    | 1.13 | 1.24 | 1.05 | 53.9  | 0.130 | 6.64 | 2      | 559 | 553 |
| 125 | M | 1 | 20-24         | 1 | 72.8 | -12.1 | 69.8 | 189   | 0.67 | 1.44 | 1.19 | 8.5   | 0.170 | 4.16 | 3-4    | 348 | 269 |
| 126 | M | 0 | 35-39         | 0 | 75.6 | -12.5 | 72.2 | 197   | 0.82 | 1.56 | 1.19 | 81.5  | 0.190 | 4.23 | 3-4    | 402 | 377 |
| 127 | M | 0 | 25-29         | 1 | 44.9 | -6.9  | 43.0 | 47    | 0.51 | 1.08 | 0.97 | 12.0  | 0.070 | 6.69 | 1-2    | 601 | 486 |
| 128 | F | 0 | 35-39         | 0 | 77.5 | -14.3 | 74.7 | 216   | 0.72 | 1.11 | 1.37 | 44.6  | 0.039 | 6.01 | 4      | 351 | 277 |
| 129 | M | 0 | 30-34         | 0 | 46.0 | -6.9  | 44.5 | 42    | 0.40 | 1.08 | 1.02 | 37.3  | 0.047 | 7.00 | 1      | 521 | 506 |
| 130 | F | 0 | 25-29         | 0 | 49.7 | -7.7  | 48.2 | 120   | 1.46 | 1.38 | 1.06 | 25.9  | 0.207 | 5.74 | 3      | 473 | 449 |
| 131 | M | 0 | 20-24         | 0 | 49.9 | -7.8  | 49.3 | 146   | 1.85 | 1.50 | 1.09 | 14.6  | 0.257 | 5.43 | 3-4    | 490 | 439 |
| 132 | M | 1 | 15-19         | 1 | 59.5 | -9.2  | 60.1 | 222   | 2.30 | 1.87 | 1.25 | 18.2  | 0.446 | 4.47 | 4      | 528 | 439 |
| 133 | F | 1 | 15-19         | 0 | 57.7 | -9.0  | 55.2 | 164   | 1.83 | 1.42 | 1.18 | 18.8  | 0.282 | 4.81 | 3-4    | 445 | 440 |
| 134 | F | 1 | 20-24         | 1 | 52.7 | -8.9  | 51.7 | 159   | 1.83 | 1.48 | 1.09 | 10.4  | 0.312 | 4.90 | 3-4    | 414 | 381 |
| 135 | M | 0 | 20-24         | 0 | 42.3 | -6.2  | 41.0 | 45    | 0.62 | 1.12 | 1.01 | 38.7  | 0.069 | 7.29 | 1      | 515 | 493 |
| 136 | M | 1 | 35-39         | 1 | 55.7 | -8.9  | 53.4 | 192   | 2.22 | 1.67 | 1.16 | 9.9   | 0.295 | 5.35 | 3-4    | 470 | 393 |
| 137 | F | 1 | 14 or younger | 1 | 51.2 | -7.8  | 50.3 | 66    | 0.51 | 1.16 | 1.09 | 22.6  | 0.038 | 5.52 | 2      | 454 | 445 |
| 138 | M | 1 | 15-19         | 0 | 57.7 | -8.8  | 57.5 | 160   | 1.60 | 1.46 | 1.21 | 68.7  | 0.305 | 4.70 | 3-4    | 493 | 440 |
| 139 | F | 0 | 14 or younger | 0 | 46.8 | -6.9  | 45.5 | 31    | 0.14 | 1.05 | 1.04 | 2.9   | 0.009 | 6.89 | 1      | 511 | 503 |
| 140 | M | 1 | 15-19         | 1 | 72.2 | -11.0 | 70.6 | 180   | 0.67 | 1.47 | 1.24 | 53.2  | 0.151 | 4.29 | 3-4    | 415 | 385 |
| 141 | M | 1 | 30-34         | 0 | 47.5 | -6.6  | 46.4 | 113   | 1.50 | 1.32 | 0.99 | 18.5  | 0.173 | 6.12 | 3      | 509 | 481 |
| 142 | M | 1 | 20-24         | 1 | 72.8 | -10.9 | 68.1 | 219   | 1.39 | 1.64 | 1.23 | 62.6  | 0.324 | 3.99 | 4      | 450 | 343 |
| 143 | M | 0 | 20-24         | 0 | 52.6 | -7.9  | 51.2 | 115   | 1.27 | 1.36 | 1.11 | 25.2  | 0.186 | 5.58 | 3      | 454 | 399 |
| 144 | M | 0 | 30-34         | 0 | 59.8 | -9.8  | 57.7 | 110   | 0.45 | 1.24 | 1.19 | 31.6  | 0.075 | 4.79 | 3      | 454 | 436 |
| 145 | F | 0 | 20-24         | 0 | 51.7 | -8.4  | 49.6 | 88    | 0.76 | 1.21 | 1.11 | 12.3  | 0.102 | 5.91 | 2-3    | 479 | 451 |
| 146 | F | 0 | 30-34         | 0 | 50.3 | -7.5  | 49.5 | 93    | 1.03 | 1.25 | 1.09 | 89.0  | 0.147 | 5.81 | 2-3    | 456 | 432 |
| 147 | M | 1 | 15-19         | 0 | 42.4 | -6.2  | 41.4 | 77    | 1.08 | 1.19 | 0.98 | 22.4  | 0.119 | 6.77 | 2      | 504 | 481 |
| 148 | F | 0 | 20-24         | 0 | 50.5 | -7.8  | 50.0 | 122   | 1.40 | 1.40 | 1.11 | 57.0  | 0.208 | 5.38 | 3      | 536 | 514 |
| 149 | M | 0 | 20-24         | 0 | 48.7 | -7.2  | 47.3 | 68    | 0.65 | 1.15 | 1.07 | 3.7   | 0.085 | 6.48 | 2      | 464 | 451 |
| 150 | F | 0 | 50 or older   | 0 | 57.9 | -9.9  | 55.2 | 112   | 0.96 | 1.34 | 1.04 | 41.5  | 0.128 | 5.09 | 3      | 434 | 367 |
| 151 | M | 0 | 20-24         | 0 | 45.0 | -6.7  | 43.5 | 61.00 | 0.76 | 1.14 | 1.0  | 14.20 | 0.10  | 6.47 | 2      | 543 | 500 |
| 152 | M | 0 | 40-44         | 0 | 55.2 | -8.1  | 54.1 | 109   | 0.78 | 1.25 | 1.17 | 12.5  | 0.073 | 5.04 | 3      | 473 | 449 |
| 153 | M | 0 | 45-49         | 0 | 73.0 | -12.4 | 69.8 | 203   | 0.89 | 1.44 | 1.27 | 27.3  | 0.224 | 4.06 | 4      | 344 | 314 |
| 154 | F | 0 | 45-49         | 0 | 59.2 | -9.2  | 56.9 | 159   | 1.56 | 1.30 | 1.16 | 29.9  | 0.183 | 4.93 | 3-4    | 482 | 449 |
| 155 | M | 0 | 40-44         | 0 | 47.7 | -7.4  | 46.4 | 103   | 1.34 | 1.34 | 1.04 | 58.1  | 0.173 | 6.07 | 3      | 474 | 446 |
| 156 | F | 0 | 50 or older   | 0 | 56.2 | -8.8  | 54.6 | 107   | 0.89 | 1.23 | 1.14 | 42.8  | 0.139 | 5.30 | 3      | 479 | 472 |
| 157 | M | 0 | 30-34         | 0 | 48.6 | -7.4  | 46.8 | 83    | 0.97 | 1.21 | 1.04 | 26.1  | 0.084 | 6.59 | 2      | 495 | 450 |
| 158 | M | 1 | 35-39         | 0 | 77.6 | -13.3 | 73.1 | 204   | 1.10 | 1.65 | 1.25 | 104.8 | 0.230 | 3.88 | 4      | 460 | 320 |
